# Supplementary material for: A Novel Tumor-Promoting Function Residing in the 5′ Non-coding Region of vascular endothelial growth factor mRNA
Source: PLOS journal article supplement (doi:10.1371/journal.pmed.0050094), 2008-05-14
Supplement: S1 (10.1371/journal.pmed.0050094.s001) [file journal.pmed.0050094.s001]

**Table S1.** List of all genes selectively up-regulated in *vegf* 5’UTR-overexpressing cells

Genbank Fold

Gene Symbol accession No. Gene Name change

| SPARC | NM_003118 | secreted protein, acidic, cysteine-rich (osteonectin) | 38.72 |
| --- | --- | --- | --- |
| LOC150763 | AK131197 | hypothetical protein LOC150763 | 33.13 |
| CD33 | NM_001772 | CD33 antigen (gp67) | 19.45 |
| TESC | NM_017899 | tescalcin | 16.13 |
| HKDC1 | NM_025130 | hexokinase domain containing 1 | 13.80 |
| CXCR4 | NM_001008540 | chemokine (C-X-C motif) receptor 4 | 12.44 |
| IL1F10 | NM_032556 | interleukin 1 family, member 10 (theta) | 10.23 |
| COL13A1 | NM_005203 | collagen, type XIII, alpha 1 | 9.60 |
| MIA | NM_006533 | melanoma inhibitory activity | 8.79 |
| NCKAP1L | NM_005337 | NCK-associated protein 1-like | 8.72 |
| ChGn | NM_018371 | chondroitin beta1,4 N-acetylgalactosaminyltransferase | 8.60 |
| TGFBI | NM_000358 | transforming growth factor, beta-induced, 68kDa | 8.17 |
| BE893137 |  |  | 8.07 |
| ARL4C | NM_005737 | ADP-ribosylation factor-like 4C | 7.56 |
| FAM77C | NM_024522 | family with sequence similarity 77, member C | 7.49 |
| CDH4 | AK025855 | cadherin 4, type 1, R-cadherin (retinal) | 7.38 |
| NAV3 | NM_014903 | neuron navigator 3 | 7.01 |
| FRY | NM_023037 | furry homolog (Drosophila) | 6.51 |
| DUSP13 | NM_001007271 | dual specificity phosphatase 13 | 6.49 |
| CYP24A1 | NM_000782 | cytochrome P450, family 24, subfamily A, polypeptide 1 | 6.44 |
| LOXL2 | NM_002318 | lysyl oxidase-like 2 | 6.43 |
| CYP3A5 | NM_000777 | cytochrome P450, family 3, subfamily A, polypeptide 5 | 6.28 |
| TNFRSF6B | NM_032945 | tumor necrosis factor receptor superfamily, member 6b, decoy | 6.21 |
| SLC9A7 | NM_032591 | solute carrier family 9 (sodium/hydrogen exchanger), member 7 | 6.17 |
| KIAA1815 | NM_024896 | KIAA1815 | 6.11 |
| ENST00000336749 |  |  | 5.89 |
| IL32 | NM_001012631 | interleukin 32 | 5.83 |
| ANKRD20A2 | NM_001012421 | ankyrin repeat domain 20 family, member A2 | 5.75 |
| ARHGDIB | NM_001175 | Rho GDP dissociation inhibitor (GDI) beta | 5.74 |
| MGC10955 | BC004960 | hypothetical protein MGC10955 | 5.69 |
| C10orf58 | NM_032333 | chromosome 10 open reading frame 58 | 5.60 |
| METTL7A | NM_014033 | methyltransferase like 7A | 5.57 |
| NEDD9 | NM_006403 | neural precursor cell expressed, developmentally down-regulated 9 | 5.55 |
| DMBT1 | NM_007329 | deleted in malignant brain tumors 1 | 5.52 |
| LOC92196 | NM_001017920 | similar to death-associated protein | 5.39 |
| CLDN2 | NM_020384 | claudin 2 | 5.38 |
| SLC1A1 | NM_004170 | solute carrier family 1 (neuronal/epithelial high affinity glutamate transporter, system Xag), member 1 | 5.36 |
| SPATA13 | NM_153023 | spermatogenesis associated 13 | 5.27 |
| ABCA3 | NM_001089 | ATP-binding cassette, sub-family A (ABC1), member 3 | 5.01 |
| ENST00000370237 |  |  | 4.97 |
| ABCC2 | NM_000392 | ATP-binding cassette, sub-family C (CFTR/MRP), member 2 | 4.79 |
| PDCD8 | NM_004208 | programmed cell death 8 (apoptosis-inducing factor) | 4.74 |
| PRF1 | NM_005041 | perforin 1 (pore forming protein) | 4.73 |
| A_23_P123234 |  |  | 4.71 |
| MYLPF | NM_013292 | fast skeletal myosin light chain 2 | 4.71 |
| SPRY1 | NM_199327 | sprouty homolog 1, antagonist of FGF signaling (Drosophila) | 4.53 |
| ZNF426 | NM_024106 | zinc finger protein 426 | 4.52 |
| KLRC3 | NM_007333 | killer cell lectin-like receptor subfamily C, member 3 | 4.48 |
| GLDC | NM_000170 | glycine dehydrogenase (decarboxylating; glycine decarboxylase, glycine cleavage system protein P) | 4.47 |
| C10orf81 | AK126354 | chromosome 10 open reading frame 81 | 4.46 |
| ACO1 | NM_002197 | aconitase 1, soluble | 4.38 |
| PSD3 | NM_015310 | pleckstrin and Sec7 domain containing 3 | 4.37 |
| CA12 | NM_001218 | carbonic anhydrase XII | 4.33 |
| A_23_P170719 |  |  | 4.32 |
| ANGPTL4 | NM_139314 | angiopoietin-like 4 | 4.32 |
| MYO5A | NM_000259 | myosin VA (heavy polypeptide 12, myoxin) | 4.28 |
| CGB1 | NM_033377 | chorionic gonadotropin, beta polypeptide 1 | 4.25 |
| SERPINA5 | NM_000624 | serpin peptidase inhibitor, clade A (alpha-1 antiproteinase, antitrypsin), member 5 | 4.16 |
| ACTL6B | NM_016188 | actin-like 6B | 3.97 |
| SAPS1 | NM_014931 | SAPS domain family, member 1 | 3.94 |
| FGF19 | NM_005117 | fibroblast growth factor 19 | 3.92 |
| IRX5 | NM_005853 | iroquois homeobox protein 5 | 3.92 |
| AIM1 | NM_001624 | absent in melanoma 1 | 3.91 |
| SAT | NM_002970 | spermidine/spermine N1-acetyltransferase | 3.87 |
| LCP1 | NM_002298 | lymphocyte cytosolic protein 1 (L-plastin) | 3.86 |
| THC2276562 |  |  | 3.84 |
| PCSK4 | NM_017573 | proprotein convertase subtilisin/kexin type 4 | 3.84 |
| CITED1 | NM_004143 | Cbp/p300-interacting transactivator, with Glu/Asp-rich carboxy-terminal domain, 1 | 3.81 |
| KRT6B | NM_005555 | keratin 6B | 3.79 |
| MYO1E | U14391 | myosin IE | 3.76 |
| COL12A1 | NM_004370 | collagen, type XII, alpha 1 | 3.74 |
| JMJD2C | NM_015061 | jumonji domain containing 2C | 3.74 |
| DENND2A | NM_015689 | DENN/MADD domain containing 2A | 3.72 |
| BC064982 |  |  | 3.69 |
| KATNAL1 | NM_032116 | katanin p60 subunit A-like 1 | 3.67 |
| NFE2 | NM_006163 | nuclear factor (erythroid-derived 2), 45kDa | 3.67 |
| SCN4B | NM_174934 | sodium channel, voltage-gated, type IV, beta | 3.63 |
| CXXC4 | NM_025212 | CXXC finger 4 | 3.60 |
| COL7A1 | NM_000094 | collagen, type VII, alpha 1 (epidermolysis bullosa, dystrophic, dominant and recessive) | 3.60 |
| LAMA3 | NM_198129 | laminin, alpha 3 | 3.57 |
| PLD1 | NM_002662 | phospholipase D1, phosphatidylcholine-specific | 3.55 |
| ALK | D45915 | anaplastic lymphoma kinase (Ki-1) | 3.55 |
| GALNT4 | NM_003774 | UDP-N-acetyl-alpha-D-galactosamine:polypeptide N-acetylgalactosaminyltransferase 4 | 3.51 |
| DBP | NM_001352 | D site of albumin promoter (albumin D-box) binding protein | 3.44 |
| KIAA1706 | NM_030636 | KIAA1706 protein | 3.44 |
| FLJ20366 | NM_017786 | hypothetical protein FLJ20366 | 3.43 |
| BX648591 |  |  | 3.42 |
| ENST00000355748 |  |  | 3.40 |
| ENST00000371753 |  |  | 3.38 |
| PLAT | NM_000930 | plasminogen activator, tissue | 3.37 |
| ADM | NM_001124 | adrenomedullin | 3.33 |
| MYBPH | NM_004997 | myosin binding protein H | 3.32 |
| SESTD1 | NM_178123 | SEC14 and spectrin domains 1 | 3.31 |
| PRR4 | NM_007244 | proline rich 4 (lacrimal) | 3.29 |
| RNF128 | NM_194463 | ring finger protein 128 | 3.27 |
| LRP8 | NM_033300 | low density lipoprotein receptor-related protein 8, apolipoprotein e receptor | 3.26 |
| MGLL | NM_007283 | monoglyceride lipase | 3.21 |
| PPP1R1A | NM_006741 | protein phosphatase 1, regulatory (inhibitor) subunit 1A | 3.18 |
| KLRC4 | NM_013431 | killer cell lectin-like receptor subfamily C, member 4 | 3.16 |
| SRCRB4D | NM_080744 | scavenger receptor cysteine rich domain containing, group B (4 domains) | 3.16 |
| BNIP3 | NM_004052 | BCL2/adenovirus E1B 19kDa interacting protein 3 | 3.16 |
| FHOD3 | NM_025135 | formin homology 2 domain containing 3 | 3.16 |
| RNF24 | NM_007219 | ring finger protein 24 | 3.15 |
| LOC151146 | AK021716 | hypothetical protein LOC151146 | 3.14 |
| BC007817 |  |  | 3.13 |
| ARFGAP3 | NM_014570 | ADP-ribosylation factor GTPase activating protein 3 | 3.13 |
| TBC1D8 | NM_007063 | TBC1 domain family, member 8 (with GRAM domain) | 3.12 |
| FLJ39370 | NM_152400 | hypothetical protein FLJ39370 | 3.10 |
| POU3F2 | NM_005604 | POU domain, class 3, transcription factor 2 | 3.08 |
| TSC22D1 | NM_183422 | TSC22 domain family, member 1 | 3.06 |
| C10orf10 | NM_007021 | chromosome 10 open reading frame 10 | 3.06 |
| ICA1 | NM_004968 | islet cell autoantigen 1, 69kDa | 3.04 |
| ASPH | NM_004318 | aspartate beta-hydroxylase | 3.03 |
| RNF182 | NM_152737 | ring finger protein 182 | 3.03 |
| KRT6E | NM_173086 | keratin 6E | 3.03 |
| MAP3K15 | NM_001001671 | mitogen-activated protein kinase kinase kinase 15 | 3.03 |
| PPP1R14C | NM_030949 | protein phosphatase 1, regulatory (inhibitor) subunit 14C | 3.02 |
| GBE1 | NM_000158 | glucan (1,4-alpha-), branching enzyme 1 | 3.00 |
| HSD11B1L |  |  | 2.99 |
| MXI1 | NM_130439 | MAX interactor 1 | 2.99 |
| A_23_P66347 |  |  | 2.98 |
| EIF4B | NM_001417 | eukaryotic translation initiation factor 4B | 2.96 |
| SHANK2 | NM_012309 | SH3 and multiple ankyrin repeat domains 2 | 2.96 |
| VEGF | NM_001025366 | vascular endothelial growth factor | 2.96 |
| IER3 | NM_003897 | immediate early response 3 | 2.95 |
| ENO2 | NM_001975 | enolase 2 (gamma, neuronal) | 2.95 |
| HBG1 | NM_000559 | hemoglobin, gamma A | 2.93 |
| FKBP1B | NM_054033 | FK506 binding protein 1B, 12.6 kDa | 2.92 |
| CLCN3 | NM_173872 | chloride channel 3 | 2.92 |
| KLRC2 | NM_002260 | killer cell lectin-like receptor subfamily C, member 2 | 2.90 |
| NDRG1 | NM_006096 | N-myc downstream regulated gene 1 | 2.90 |
| HSPH1 | NM_006644 | heat shock 105kDa/110kDa protein 1 | 2.88 |
| BCL6 | NM_138931 | B-cell CLL/lymphoma 6 (zinc finger protein 51) | 2.88 |
| C17orf69 | NM_152466 | chromosome 17 open reading frame 69 | 2.88 |
| SPAG4 | NM_003116 | sperm associated antigen 4 | 2.88 |
| PRPH | NM_006262 | peripherin | 2.88 |
| PLCB3 | NM_000932 | phospholipase C, beta 3 (phosphatidylinositol-specific) | 2.87 |
| SMURF2 | NM_022739 | SMAD specific E3 ubiquitin protein ligase 2 | 2.83 |
| ANKRD15 | NM_153186 | ankyrin repeat domain 15 | 2.83 |
| KRT6C | NM_058242 | keratin 6C | 2.82 |
| LGALS1 | NM_002305 | lectin, galactoside-binding, soluble, 1 (galectin 1) | 2.80 |
| FAM80A | NM_173642 | family with sequence similarity 80, member A | 2.79 |
| FOXD1 | U59832 | forkhead box D1 | 2.77 |
| ABLIM3 | NM_014945 | actin binding LIM protein family, member 3 | 2.76 |
| PNMA1 | NM_006029 | paraneoplastic antigen MA1 | 2.76 |
| WNT16 | NM_057168 | wingless-type MMTV integration site family, member 16 | 2.76 |
| GGTLA4 | NM_080920 | gamma-glutamyltransferase-like activity 4 | 2.74 |
| MGC18216 | BC010607 | hypothetical protein MGC18216 | 2.74 |
| VGF | NM_003378 | VGF nerve growth factor inducible | 2.74 |
| RAB11FIP4 | NM_032932 | RAB11 family interacting protein 4 (class II) | 2.74 |
| P4HA1 | NM_000917 | procollagen-proline, 2-oxoglutarate 4-dioxygenase (proline 4-hydroxylase), alpha polypeptide I | 2.73 |
| HDAC4 | NM_006037 | histone deacetylase 4 | 2.72 |
| PTPN14 | NM_005401 | protein tyrosine phosphatase, non-receptor type 14 | 2.71 |
| GPC4 | NM_001448 | glypican 4 | 2.70 |
| RGS2 | NM_002923 | regulator of G-protein signalling 2, 24kDa | 2.68 |
| CSPG2 | NM_004385 | chondroitin sulfate proteoglycan 2 (versican) | 2.67 |
| PLAU | NM_002658 | plasminogen activator, urokinase | 2.67 |
| CXCL1 | NM_001511 | chemokine (C-X-C motif) ligand 1 (melanoma growth stimulating activity, alpha) | 2.66 |
| PXDN |  |  | 2.66 |
| C20orf195 | NM_024059 | chromosome 20 open reading frame 195 | 2.64 |
| MAP3K5 | NM_005923 | mitogen-activated protein kinase kinase kinase 5 | 2.64 |
| IL8 | NM_000584 | interleukin 8 | 2.63 |
| HIG2 | NM_013332 | hypoxia-inducible protein 2 | 2.63 |
| ENST00000374314 |  |  | 2.63 |
| A_23_P42594 |  |  | 2.62 |
| PCSK9 | NM_174936 | proprotein convertase subtilisin/kexin type 9 | 2.62 |
| DSC2 | NM_024422 | desmocollin 2 | 2.62 |
| SERPINE2 | NM_006216 | serpin peptidase inhibitor, clade E (nexin, plasminogen activator inhibitor type 1), member 2 | 2.61 |
| PHLDA2 | NM_003311 | pleckstrin homology-like domain, family A, member 2 | 2.60 |
| KREMEN2 | NM_172229 | kringle containing transmembrane protein 2 | 2.60 |
| SLC22A18 | NM_183233 | solute carrier family 22 (organic cation transporter), member 18 | 2.59 |
| FLJ10159 | NM_018013 | hypothetical protein FLJ10159 | 2.59 |
| MGC14425 | BC007866 | hypothetical protein MGC14425 | 2.58 |
| STC2 | NM_003714 | stanniocalcin 2 | 2.58 |
| PLA2G4A | NM_024420 | phospholipase A2, group IVA (cytosolic, calcium-dependent) | 2.57 |
| GGTL4 | NM_080839 | gamma-glutamyltransferase-like 4 | 2.56 |
| HIVEP3 | NM_024503 | human immunodeficiency virus type I enhancer binding protein 3 | 2.55 |
| MGC23280 | NM_144683 | hypothetical protein MGC23280 | 2.54 |
| ZNF395 | NM_018660 | zinc finger protein 395 | 2.54 |
| KLRC1 | NM_002259 | killer cell lectin-like receptor subfamily C, member 1 | 2.54 |
| NR4A2 | NM_006186 | nuclear receptor subfamily 4, group A, member 2 | 2.54 |
| HPCAL1 | NM_134421 | hippocalcin-like 1 | 2.53 |
| CAMK2N1 | BC020630 | calcium/calmodulin-dependent protein kinase II inhibitor 1 | 2.52 |
| INSIG2 | NM_016133 | insulin induced gene 2 | 2.52 |
| RDHE2 | NM_138969 | retinal short chain dehydrogenase reductase isoform 1 | 2.52 |
| EHF | NM_012153 | ets homologous factor | 2.50 |
| PRKAR2B | NM_002736 | protein kinase, cAMP-dependent, regulatory, type II, beta | 2.49 |
| ALDOC | NM_005165 | aldolase C, fructose-bisphosphate | 2.49 |
| SEMA6A | NM_020796 | sema domain, transmembrane domain (TM), and cytoplasmic domain, (semaphorin) 6A | 2.48 |
| SLC20A1 | NM_005415 | solute carrier family 20 (phosphate transporter), member 1 | 2.47 |
| ARL6IP5 | NM_006407 | ADP-ribosylation-like factor 6 interacting protein 5 | 2.47 |
| TBC1D16 | AK000755 | TBC1 domain family, member 16 | 2.46 |
| PHKB | NM_000293 | phosphorylase kinase, beta | 2.46 |
| SYT13 | NM_020826 | synaptotagmin XIII | 2.44 |
| PTK6 | NM_005975 | PTK6 protein tyrosine kinase 6 | 2.44 |
| NPNT | NM_001033047 | nephronectin | 2.44 |
| PC | NM_000920 | pyruvate carboxylase | 2.44 |
| SCML1 | NM_006746 | sex comb on midleg-like 1 (Drosophila) | 2.43 |
| TOMM20 | NM_014765 | translocase of outer mitochondrial membrane 20 homolog (yeast) | 2.43 |
| CDC42BPA | NM_014826 | CDC42 binding protein kinase alpha (DMPK-like) | 2.43 |
| GJA7 | NM_005497 | gap junction protein, alpha 7, 45kDa (connexin 45) | 2.42 |
| APOBEC3G | NM_021822 | apolipoprotein B mRNA editing enzyme, catalytic polypeptide-like 3G | 2.42 |
| ACAA2 | NM_006111 | acetyl-Coenzyme A acyltransferase 2 (mitochondrial 3-oxoacyl-Coenzyme A thiolase) | 2.41 |
| MMP7 | NM_002423 | matrix metallopeptidase 7 (matrilysin, uterine) | 2.41 |
| JAG1 | NM_000214 | jagged 1 (Alagille syndrome) | 2.41 |
| SLCO4A1 | NM_016354 | solute carrier organic anion transporter family, member 4A1 | 2.40 |
| BTBD11 | NM_152322 | BTB (POZ) domain containing 11 | 2.40 |
| LGALS3 | NM_002306 | lectin, galactoside-binding, soluble, 3 (galectin 3) | 2.40 |
| SSX2IP | NM_014021 | synovial sarcoma, X breakpoint 2 interacting protein | 2.39 |
| SNCG | NM_003087 | synuclein, gamma (breast cancer-specific protein 1) | 2.38 |
| HOXA13 | NM_000522 | homeobox A13 | 2.38 |
| ACOX2 | NM_003500 | acyl-Coenzyme A oxidase 2, branched chain | 2.38 |
| MGC5139 | BC004815 | hypothetical protein MGC5139 | 2.37 |
| NOSTRIN | NM_052946 | nitric oxide synthase trafficker | 2.36 |
| ENST00000328474 |  |  | 2.36 |
| JMJD1A | NM_018433 | jumonji domain containing 1A | 2.35 |
| SLC38A2 | NM_018976 | solute carrier family 38, member 2 | 2.35 |
| BNIP3L | NM_004331 | BCL2/adenovirus E1B 19kDa interacting protein 3-like | 2.35 |
| WWTR1 | NM_015472 | WW domain containing transcription regulator 1 | 2.34 |
| HPCA | NM_002143 | hippocalcin | 2.34 |
| AGTPBP1 | NM_015239 | ATP/GTP binding protein 1 | 2.33 |
| PAPSS2 | NM_001015880 | 3'-phosphoadenosine 5'-phosphosulfate synthase 2 | 2.33 |
| FLJ33790 | NM_001039548 | hypothetical protein FLJ33790 | 2.33 |
| ENST00000374395 |  |  | 2.33 |
| COL18A1 | NM_030582 | collagen, type XVIII, alpha 1 | 2.33 |
| CD44 | NM_000610 | CD44 antigen (Indian blood group) | 2.32 |
| TNNI2 | NM_003282 | troponin I type 2 (skeletal, fast) | 2.32 |
| CD55 | NM_000574 | CD55 antigen, decay accelerating factor for complement (Cromer blood group) | 2.32 |
| C6orf15 | NM_014070 | chromosome 6 open reading frame 15 | 2.32 |
| ENST00000355691 |  |  | 2.31 |
| STMN3 | NM_015894 | stathmin-like 3 | 2.31 |
| EPAS1 | NM_001430 | endothelial PAS domain protein 1 | 2.31 |
| ASGR1 | NM_001671 | asialoglycoprotein receptor 1 | 2.30 |
| WDR54 | NM_032118 | WD repeat domain 54 | 2.30 |
| STAU2 | NM_014393 | staufen, RNA binding protein, homolog 2 (Drosophila) | 2.30 |
| PRSS12 | NM_003619 | protease, serine, 12 (neurotrypsin, motopsin) | 2.30 |
| A_23_P103951 |  |  | 2.30 |
| CA9 | NM_001216 | carbonic anhydrase IX | 2.29 |
| MC1R | NM_002386 | melanocortin 1 receptor (alpha melanocyte stimulating hormone receptor) | 2.29 |
| A_23_P10571 |  |  | 2.29 |
| FAM107B | NM_031453 | family with sequence similarity 107, member B | 2.28 |
| FLJ20152 | NM_019000 | hypothetical protein FLJ20152 | 2.28 |
| KCNN4 | NM_002250 | potassium intermediate/small conductance calcium-activated channel, subfamily N, member 4 | 2.28 |
| LIF | NM_002309 | leukemia inhibitory factor (cholinergic differentiation factor) | 2.28 |
| WDR51B | NM_172240 | WD repeat domain 51B | 2.28 |
| PBX3 | NM_006195 | pre-B-cell leukemia transcription factor 3 | 2.27 |
| PRKDC | NM_006904 | protein kinase, DNA-activated, catalytic polypeptide | 2.27 |
| RNASE1 | NM_198232 | ribonuclease, RNase A family, 1 (pancreatic) | 2.27 |
| MIPEP | NM_005932 | mitochondrial intermediate peptidase | 2.27 |
| SNTB1 | NM_021021 | syntrophin, beta 1 (dystrophin-associated protein A1, 59kDa, basic component 1) | 2.26 |
| ENST00000378578 |  |  | 2.26 |
| FZD7 | NM_003507 | frizzled homolog 7 (Drosophila) | 2.26 |
| SPHAR | NM_006542 | S-phase response (cyclin-related) | 2.26 |
| B3GNT4 | NM_030765 | UDP-GlcNAc:betaGal beta-1,3-N-acetylglucosaminyltransferase 4 | 2.25 |
| CR608907 |  |  | 2.25 |
| REEP3 | NM_001001330 | receptor accessory protein 3 | 2.25 |
| UPP1 | NM_181597 | uridine phosphorylase 1 | 2.25 |
| GLRX | NM_002064 | glutaredoxin (thioltransferase) | 2.25 |
| TTC3 | NM_003316 | tetratricopeptide repeat domain 3 | 2.25 |
| A_23_P111766 |  |  | 2.24 |
| EGFR | X00588 | epidermal growth factor receptor (erythroblastic leukemia viral (v-erb-b) oncogene homolog, avian) | 2.23 |
| FARP1 | NM_005766 | FERM, RhoGEF (ARHGEF) and pleckstrin domain protein 1 (chondrocyte-derived) | 2.23 |
| SAP30 | NM_003864 | Sin3A-associated protein, 30kDa | 2.23 |
| CRYM | NM_001888 | crystallin, mu | 2.22 |
| NES | NM_006617 | nestin | 2.22 |
| CAPS | NM_004058 | calcyphosine | 2.22 |
| DDIT4 | NM_019058 | DNA-damage-inducible transcript 4 | 2.22 |
| F10 | NM_000504 | coagulation factor X | 2.21 |
| TMEM2 | NM_013390 | transmembrane protein 2 | 2.21 |
| C14orf132 | AL390130 | chromosome 14 open reading frame 132 | 2.21 |
| FLJ36874 | NM_152716 | FLJ36874 protein | 2.21 |
| SORL1 | NM_003105 | sortilin-related receptor, L(DLR class) A repeats-containing | 2.21 |
| KIAA1432 |  |  | 2.21 |
| PLOD2 | NM_182943 | procollagen-lysine, 2-oxoglutarate 5-dioxygenase 2 | 2.20 |
| MYH9 | NM_002473 | myosin, heavy polypeptide 9, non-muscle | 2.20 |
| AK3L2 | NM_001002921 | adenylate kinase 3-like 2 | 2.19 |
| CDC42EP2 | NM_006779 | CDC42 effector protein (Rho GTPase binding) 2 | 2.19 |
| SERPINB6 | NM_004568 | serpin peptidase inhibitor, clade B (ovalbumin), member 6 | 2.19 |
| UHRF2 | NM_152896 | ubiquitin-like, containing PHD and RING finger domains, 2 | 2.18 |
| POPDC3 | NM_022361 | popeye domain containing 3 | 2.18 |
| TBC1D4 | NM_014832 | TBC1 domain family, member 4 | 2.18 |
| TMOD1 | NM_003275 | tropomodulin 1 | 2.18 |
| TMEM133 |  |  | 2.18 |
| CRIP2 | NM_001312 | cysteine-rich protein 2 | 2.18 |
| ALDH1A3 | NM_000693 | aldehyde dehydrogenase 1 family, member A3 | 2.17 |
| ABLIM2 | NM_032432 | actin binding LIM protein family, member 2 | 2.17 |
| ZNRF1 | NM_032268 | zinc and ring finger 1 | 2.17 |
| TMEM158 |  |  | 2.16 |
| DSG2 | NM_001943 | desmoglein 2 | 2.16 |
| SFT2D3 | NM_032740 | SFT2 domain containing 3 | 2.15 |
| HS3ST1 | NM_005114 | heparan sulfate (glucosamine) 3-O-sulfotransferase 1 | 2.15 |
| CSPG4 | NM_001897 | chondroitin sulfate proteoglycan 4 (melanoma-associated) | 2.15 |
| FGF9 | NM_002010 | fibroblast growth factor 9 (glia-activating factor) | 2.15 |
| FUT8 | NM_178154 | fucosyltransferase 8 (alpha (1,6) fucosyltransferase) | 2.15 |
| RP4-747L4.3 | BC007072 | hypothetical protein MGC12538 | 2.14 |
| CAT | NM_001752 | catalase | 2.14 |
| JARID1B | NM_006618 | Jumonji, AT rich interactive domain 1B (RBP2-like) | 2.13 |
| ECH1 | NM_001398 | enoyl Coenzyme A hydratase 1, peroxisomal | 2.13 |
| ADAMTS7 | NM_014272 | ADAM metallopeptidase with thrombospondin type 1 motif, 7 | 2.13 |
| HOXA4 | NM_002141 | homeobox A4 | 2.13 |
| FAT | NM_005245 | FAT tumor suppressor homolog 1 (Drosophila) | 2.13 |
| HIPK2 | NM_022740 | homeodomain interacting protein kinase 2 | 2.12 |
| CDKN2D | NM_001800 | cyclin-dependent kinase inhibitor 2D (p19, inhibits CDK4) | 2.12 |
| DUSP6 | NM_001946 | dual specificity phosphatase 6 | 2.12 |
| C16orf48 | NM_032140 | chromosome 16 open reading frame 48 | 2.12 |
| EIF2AK1 | NM_014413 | eukaryotic translation initiation factor 2-alpha kinase 1 | 2.12 |
| THC2352042 |  |  | 2.12 |
| RAMP1 | NM_005855 | receptor (calcitonin) activity modifying protein 1 | 2.12 |
| ERRFI1 | NM_018948 | ERBB receptor feedback inhibitor 1 | 2.12 |
| CHST6 | NM_021615 | carbohydrate (N-acetylglucosamine 6-O) sulfotransferase 6 | 2.12 |
| ERO1L | NM_014584 | ERO1-like (S. cerevisiae) | 2.12 |
| CPNE7 | NM_014427 | copine VII | 2.11 |
| OXCT1 | NM_000436 | 3-oxoacid CoA transferase 1 | 2.11 |
| YEATS2 | NM_018023 | YEATS domain containing 2 | 2.11 |
| KCNMB4 | NM_014505 | potassium large conductance calcium-activated channel, subfamily M, beta member 4 | 2.11 |
| PAQR8 | NM_133367 | progestin and adipoQ receptor family member VIII | 2.11 |
| GEM | NM_005261 | GTP binding protein overexpressed in skeletal muscle | 2.10 |
| FAM121B |  |  | 2.10 |
| DICER1 | NM_177438 | Dicer1, Dcr-1 homolog (Drosophila) | 2.10 |
| CXCL2 | NM_002089 | chemokine (C-X-C motif) ligand 2 | 2.10 |
| PRSS2 | NM_002770 | protease, serine, 2 (trypsin 2) | 2.10 |
| WDR37 | NM_014023 | WD repeat domain 37 | 2.09 |
| VAT1 | NM_006373 | vesicle amine transport protein 1 homolog (T californica) | 2.09 |
| DIAPH2 | NM_007309 | diaphanous homolog 2 (Drosophila) | 2.09 |
| PRSS3 | NM_002771 | protease, serine, 3 (mesotrypsin) | 2.09 |
| WRB | NM_004627 | tryptophan rich basic protein | 2.09 |
| OBFC1 | NM_024928 | oligonucleotide/oligosaccharide-binding fold containing 1 | 2.09 |
| ENST00000375077 |  |  | 2.08 |
| SNX25 | NM_031953 | sorting nexin 25 | 2.08 |
| HYAL3 | NM_003549 | hyaluronoglucosaminidase 3 | 2.08 |
| CD58 | NM_001779 | CD58 antigen, (lymphocyte function-associated antigen 3) | 2.08 |
| RAB40B | NM_006822 | RAB40B, member RAS oncogene family | 2.07 |
| MORC4 | NM_024657 | MORC family CW-type zinc finger 4 | 2.07 |
| SOX9 | NM_000346 | SRY (sex determining region Y)-box 9 (campomelic dysplasia, autosomal sex-reversal) | 2.07 |
| OVOS2 | BC039117 | ovostatin 2 | 2.07 |
| KCNQ1 | NM_000218 | potassium voltage-gated channel, KQT-like subfamily, member 1 | 2.07 |
| ETV2 | NM_014209 | ets variant gene 2 | 2.07 |
| BX538051 |  |  | 2.07 |
| MYBL1 | X66087 | v-myb myeloblastosis viral oncogene homolog (avian)-like 1 | 2.07 |
| CSF1R | NM_005211 | colony stimulating factor 1 receptor, formerly McDonough feline sarcoma viral (v-fms) oncogene homolog | 2.07 |
| MSX1 | NM_002448 | msh homeobox homolog 1 (Drosophila) | 2.07 |
| NMB | NM_021077 | neuromedin B | 2.06 |
| SPATA20 | NM_022827 | spermatogenesis associated 20 | 2.06 |
| EXOC4 | NM_021807 | exocyst complex component 4 | 2.06 |
| CHDH | AJ272267 | choline dehydrogenase | 2.06 |
| PDXK | NM_003681 | pyridoxal (pyridoxine, vitamin B6) kinase | 2.06 |
| WDR60 | NM_018051 | WD repeat domain 60 | 2.06 |
| EMP1 | NM_001423 | epithelial membrane protein 1 | 2.06 |
| SLC25A37 | AF495725 | solute carrier family 25, member 37 | 2.06 |
| THC2370681 |  |  | 2.06 |
| SH3RF2 | NM_152550 | SH3 domain containing ring finger 2 | 2.05 |
| MSN | NM_002444 | moesin | 2.05 |
| TMEPAI | NM_020182 | transmembrane, prostate androgen induced RNA | 2.05 |
| C3orf28 | NM_014367 | chromsome 3 open reading frame 28 | 2.05 |
| HDAC2 | NM_001527 | histone deacetylase 2 | 2.05 |
| P4HA2 | NM_004199 | procollagen-proline, 2-oxoglutarate 4-dioxygenase (proline 4-hydroxylase), alpha polypeptide II | 2.04 |
| ABCC3 | NM_020038 | ATP-binding cassette, sub-family C (CFTR/MRP), member 3 | 2.04 |
| SPRY4 | NM_030964 | sprouty homolog 4 (Drosophila) | 2.04 |
| REEP1 | NM_022912 | receptor accessory protein 1 | 2.04 |
| INPP5F | NM_014937 | inositol polyphosphate-5-phosphatase F | 2.03 |
| BC018095 |  |  | 2.03 |
| KLF6 | NM_001300 | Kruppel-like factor 6 | 2.03 |
| KCNS3 | NM_002252 | potassium voltage-gated channel, delayed-rectifier, subfamily S, member 3 | 2.03 |
| CBWD2 | NM_172003 | COBW domain containing 2 | 2.02 |
| EPS8 | NM_004447 | epidermal growth factor receptor pathway substrate 8 | 2.02 |
| PITPNC1 | NM_012417 | phosphatidylinositol transfer protein, cytoplasmic 1 | 2.02 |
| CORO2A | NM_003389 | coronin, actin binding protein, 2A | 2.01 |
| PON3 | NM_000940 | paraoxonase 3 | 2.01 |
| ENST00000379969 |  |  | 2.01 |
| HK1 | NM_033500 | hexokinase 1 | 2.01 |
| CAV2 | NM_001233 | caveolin 2 | 2.01 |
| PGK1 | NM_000291 | phosphoglycerate kinase 1 | 2.01 |
| KHDRBS3 | NM_006558 | KH domain containing, RNA binding, signal transduction associated 3 | 2.01 |
| POM121 | AB014518 | POM121 membrane glycoprotein (rat) | 2.01 |
| HLCS | NM_000411 | holocarboxylase synthetase (biotin-(proprionyl-Coenzyme A-carboxylase (ATP-hydrolysing)) ligase) | 2.00 |
| FANK1 | NM_145235 | fibronectin type III and ankyrin repeat domains 1 | 2.00 |
| GPI | NM_000175 | glucose phosphate isomerase | 2.00 |
